# Supplementary material for: Tailoring a sulfur doped carbon nitride skeleton to enhance the photocatalytic hydrogen evolution activity
Source: Royal Society of Chemistry journal article supplement (doi:10.1039/d3nj04167k), 2023-01-01
Supplement: d3nj04167k1.pdf [file d3nj04167k1.pdf]

**Electronic Supplementary Information for**  
**Tailoring sulfur doped carbon nitride skeleton with**  
**elevating photocatalytic hydrogen evolution activity**

*Tianyu Zhou<sup>a, b, c, d, e</sup>, Feifan Cui<sup>a, c</sup>, Guijie Li<sup>b</sup>, Xiaozhong Sun<sup>b</sup>, Dongshu Sun<sup>a, c, d</sup>, Chunbo Liu<sup>a, c, d, \*</sup>, Chun Zhao<sup>e, \*</sup>, Shangyu Li<sup>b, \*</sup>*

*a Key Laboratory of Preparation and Application of Environmental Friendly Materials, Ministry of Education, Jilin Normal University, Changchun 130103, China*

*b Jilin province product quality supervision and inspection institute, Changchun 130012, China*

*c College of Engineering, Jilin Normal University, Siping 136000, China*

*d Jilin Joint Technology Innovation Laboratory of Developing and Utilizing Materials of Reducing Pollution and Carbon Emissions, Jilin Normal University, Siping 136000, China*

*e State Key Laboratory on Integrated Optoelectronics, College of Electronic Science and Engineering, Jilin University, Changchun 130012, China*

---

\* Corresponding author: Chunbo Liu (chunboliu@jlnu.edu.cn), Chun Zhao (zchun@jlu.edu.cn), Shangyu Li (cczjlee163.com)

## Chemicals and instruments

Urea, dithizone, triethanolamine (TEOA) and chloroplatinic acid hexahydrate ( $\text{H}_2\text{PtCl}_6 \cdot 6\text{H}_2\text{O}$ ) were obtained in Macklin Reagents Co., Ltd. The crystallization properties and functional groups of CN and x-TACN were recorded via X-ray diffraction (XRD, RIGAKU, D/max-2500) and fourier transform infrared spectroscopy (FTIR, thermoscientific Nicolet 4700), respectively. The structure and morphology were tested by field emission scanning electron microscopy (FESEM, Hitachi regulus 8100) and transmission electron microscopy (TEM, JEM-2100F). X-ray photoelectron spectroscopy (XPS) and UV-vis diffuse reflectance spectrum (UV-vis DRS) were obtained by ESCALAB250XI electronic spectrometer (VG scientific, USA) and Cary 500 spectrometer (Shimadzu UV-2550, Japan), respectively. Photoluminescence (PL), time-resolved PL (TR-PL) spectra, photocurrent response (PCR) and electrochemical impedance spectroscopy (EIS) were characterized by F4500 (Hitachi, Japan) photoluminescence detector, IBH-TemPro (HORIBA JobinYvon, France), CHI760E electrochemical workstation (Shanghai Chenhua Instrument Co., Ltd.) and PGSTAT-302N (metrohm China Ltd.) electrochemical workstation, respectively.
